# Supplementary material for: Atom economic synthesis of amides via transition metal catalyzed rearrangement of oxaziridines
Source: Royal Society of Chemistry journal article supplement (doi:10.1039/b706164a), 2007-01-01
Supplement: b706164a.pdf [file b706164a.pdf]

## Electronic Supplementary Information for

### Atom Economic Synthesis of Amides via Transition Metal Catalyzed Rearrangement of Oxaziridines

Chin Hin Leung, Adelina M. Voutchkova, Robert H. Crabtree, David Balcells and Odile Eisenstein

#### Experimental Details

##### 1. Synthesis of imines.

Imines were synthesised from the corresponding aldehydes and amines either on basic alumina according to the procedure of Texier-Boullet<sup>1</sup> or in aqueous medium as reported by Tashiro and coworkers.<sup>2</sup>

##### 2. Sodium tungstate-catalyzed oxidation of imines to oxaziridines.

Except for a lowered catalyst loading (2 mol% instead of 10 mol%), the procedure was the same as described by Rao and coworkers.<sup>3</sup> To the imine (1 mmol) was added Na<sub>2</sub>WO<sub>4</sub>·2H<sub>2</sub>O (0.02 mmol) and acetonitrile (5 ml), followed by dropwise addition of H<sub>2</sub>O<sub>2</sub> (5 ml, 30% in H<sub>2</sub>O). The mixture was stirred at room temperature for 10 hr. The mixture was then reduced in volume *in vacuo*, cooled to 4°C and quenched with Na<sub>2</sub>SO<sub>3</sub>. Extraction with chloroform followed by drying with MgSO<sub>4</sub> and removal of solvent *in vacuo* yielded the corresponding oxaziridines, which were then used for the metal-catalyzed isomerization to amides without further purification.

##### 3. Metal catalyzed rearrangement of oxaziridines to amides.

A mixture of oxaziridine (0.25 mmol), 1,3,5-trimethoxybenzene (10.0 mg) and metal complex in 5 ml solvent was heated at reflux for 12 hr. Standard Schlenk techniques were applied in the case of Pd, Rh and Ir compounds to exclude air. Yields were determined by the <sup>1</sup>H NMR peak integrations of the resulting amides with respect to the internal standard 1,3,5-trimethoxybenzene. The identity of the amides was confirmed by comparison of the <sup>1</sup>H NMR data to published spectra.<sup>4</sup>

---

<sup>1</sup> F. Texier-boullet, *Synthesis*, 1985, 679.

<sup>2</sup> A. Simion, C. Simion, T. Kanda, S. Nagashima, Y. Mitoma, T. Yamada, K. Mimura and M. Tashiro, *J. Chem. Soc.-Perkin Trans. 1*, 2001, 2071.

<sup>3</sup> M. Shailaja, A. Manjula and B. V. Rao, *Synlett*, 2005, 1176.

<sup>4</sup> a) W.-J. Yoo and C.-J. Li, *J. Am. Chem. Soc.*, 2006, **128**, 13064 b) Y. J. Kang, H. A. Chung, J. J. Kim and Y. J. Yoon, *Synthesis*, 2002, 733; J. H. Rigby and S. Laurent, *J. Org. Chem.*, 1998, **63**, 6742.

## Computational Details

### References for the theoretical methods

B3PW91 hybrid functional:

- [1] A. D. Becke, *J. Chem. Phys.*, 1993, **98**, 5648.  
[2] J. P. Perdew and Y. Wang, *Phys. Rev. B*, 1992, **45**, 13244.

sddall basis set:

- [3] D. Andrae, U. Haussermann, M. Dolg, H. Stoll and H. Preuss, *Theor. Chim. Acta*, 1990, **77**, 123.  
[4] A. W. Ehlers, M. Bohme, S. Dapprich, A. Gobbi, A. Hollwarth, V. Jonas, K. F. Kohler, R. Stegmann, A. Veldkamp and G. Frenking, *Chem. Phys. Lett.*, 1993, **208**, 111.  
[5] A. Bergner, M. Dolg, W. Kuchle, H. Stoll and H. Preuss, *Mol. Phys.*, 1993, **30**, 1431.  
[6] A. Hollwarth, H. Bohme, S. Dapprich, A. W. Ehlers, A. Gobbi, V. Jonas, K. F. Kohler, R. Stegmann, A. Veldkamp and G. Frenking, *Chem. Phys. Lett.*, 1993, **203**, 237.

6-31g(d,p) basis set:

- [7] P. C. Hariharan and J. A. Pople, *Theor. Chim. Acta*, 1973, **28**, 213.

### Geometries and energies

Optimized geometries and absolute potential (E), enthalpy (H) and Gibbs free (G) energies in hartrees. The **S**, **C** and **P** labels stand for the substrate, catalyst and product respectively.

**S** E=-248.334240946 H=-248.222619 G=-248.271154

|   |           |           |           |
|---|-----------|-----------|-----------|
| N | -0.132023 | -0.530816 | 0.549628  |
| O | 1.153537  | 0.011908  | 0.037447  |
| C | -0.068925 | 0.396973  | -0.534001 |
| H | -0.358591 | 1.432307  | -0.320141 |
| C | -0.403811 | 0.073273  | 1.848673  |
| H | -0.127257 | 1.134610  | 1.902463  |
| H | -1.475850 | -0.039241 | 2.044722  |
| H | 0.146292  | -0.478861 | 2.614787  |
| C | -0.380136 | -0.098242 | -1.914887 |
| H | 0.174726  | 0.482592  | -2.658543 |
| H | -0.097541 | -1.149273 | -1.999385 |
| H | -1.448687 | 0.006288  | -2.129582 |

**C** E=-437.673655382 H=-437.472172 G=-437.539042

|    |           |           |           |
|----|-----------|-----------|-----------|
| Rh | -0.168212 | -0.403368 | 0.603061  |
| Cl | 0.036312  | 0.236707  | 2.801233  |
| C  | 1.207633  | 0.947606  | -0.116939 |
| C  | 2.046634  | 0.358749  | -1.229205 |

|   |           |           |           |
|---|-----------|-----------|-----------|
| C | -1.717203 | 0.313882  | -1.850449 |
| C | 1.255262  | -0.639681 | -2.092811 |
| C | -1.147210 | -0.923401 | -1.184922 |
| C | 0.192617  | -1.351094 | -1.269986 |
| H | 1.778194  | 1.318646  | 0.735257  |
| H | 2.891673  | -0.157108 | -0.760409 |
| H | 0.787369  | -0.134073 | -2.943922 |
| H | -1.857633 | 0.148405  | -2.928821 |
| H | -1.890464 | -1.680524 | -0.917975 |
| H | 2.481467  | 1.160918  | -1.844840 |
| H | -2.716277 | 0.479434  | -1.433457 |
| H | 1.940245  | -1.378159 | -2.521662 |
| H | 0.392574  | -2.401191 | -1.046674 |
| C | -0.117961 | 1.469788  | -0.262374 |
| H | -0.436241 | 2.179835  | 0.501100  |
| C | -0.853327 | 1.562226  | -1.593942 |
| H | -1.489458 | 2.452810  | -1.592166 |
| H | -0.127905 | 1.710112  | -2.401348 |

**II** E=-686.052301803 H=-685.735915 G=-685.825785

|    |           |           |           |
|----|-----------|-----------|-----------|
| Rh | 0.270431  | -0.105320 | 0.034271  |
| Cl | 2.372726  | -0.140553 | -1.070194 |
| N  | -0.542568 | -0.490267 | -1.897893 |
| O  | -1.878948 | -0.001642 | -2.292980 |
| C  | -0.341065 | -1.856992 | -2.390740 |
| H  | -0.768598 | -1.981908 | -3.390437 |
| H  | 0.738042  | -2.028295 | -2.400251 |
| H  | -0.816294 | -2.551177 | -1.695879 |
| C  | -0.711781 | 0.517555  | -2.901737 |
| H  | -0.557841 | 0.170476  | -3.926817 |
| C  | -0.324385 | 1.934302  | -2.626974 |
| H  | -0.492809 | 2.179110  | -1.576164 |
| H  | 0.735936  | 2.074806  | -2.853775 |
| H  | -0.916768 | 2.603144  | -3.259868 |
| C  | 1.119377  | 0.921634  | 1.688989  |
| C  | 0.137786  | 1.948356  | 2.209848  |
| C  | -1.107981 | -1.671484 | 2.178783  |
| C  | -1.324909 | 1.477939  | 2.109267  |
| C  | -1.466678 | -0.844038 | 0.962753  |
| C  | -1.542960 | 0.565402  | 0.910049  |
| H  | 2.056874  | 1.327014  | 1.310257  |
| H  | 0.264742  | 2.855736  | 1.608574  |
| H  | -1.630622 | 0.963964  | 3.026961  |
| H  | -1.969738 | -1.767894 | 2.857153  |
| H  | -2.048938 | -1.384973 | 0.214096  |
| H  | 0.387720  | 2.232192  | 3.243625  |
| H  | -0.880637 | -2.685560 | 1.830115  |
| H  | -1.982337 | 2.349895  | 2.023715  |
| H  | -2.153744 | 0.979773  | 0.108238  |
| C  | 1.098483  | -0.451009 | 1.973623  |
| H  | 2.015966  | -1.002216 | 1.771986  |

|   |           |           |          |
|---|-----------|-----------|----------|
| C | 0.116217  | -1.114258 | 2.925653 |
| H | 0.623228  | -1.926340 | 3.457411 |
| H | -0.192978 | -0.398376 | 3.694154 |

**I2** E=-686.028817121 H=-685.714325 G=-685.802862

|    |           |           |           |
|----|-----------|-----------|-----------|
| Rh | 0.287523  | 0.003020  | -0.163766 |
| Cl | 2.285515  | -0.708008 | 0.825549  |
| N  | 0.032931  | 0.111049  | 3.138792  |
| O  | -0.519266 | 0.597791  | 1.831538  |
| C  | 0.257497  | 1.265887  | 3.993748  |
| H  | -0.540305 | 2.018074  | 3.934289  |
| H  | 0.330941  | 0.884146  | 5.017850  |
| H  | 1.215301  | 1.713102  | 3.721829  |
| C  | -1.316906 | -0.135149 | 2.761006  |
| H  | -2.088653 | 0.492809  | 3.217290  |
| C  | -1.704593 | -1.537800 | 2.416508  |
| H  | -0.865825 | -2.039596 | 1.928635  |
| H  | -1.964739 | -2.078746 | 3.332463  |
| H  | -2.576671 | -1.548079 | 1.756448  |
| C  | 0.679567  | -1.165368 | -1.848360 |
| C  | -0.599849 | -1.727955 | -2.427269 |
| C  | -0.438989 | 2.084552  | -2.177998 |
| C  | -1.785505 | -0.757124 | -2.287679 |
| C  | -1.066003 | 1.371442  | -0.998431 |
| C  | -1.658213 | 0.090847  | -1.030155 |
| H  | 1.406514  | -1.913663 | -1.534086 |
| H  | -0.826106 | -2.650869 | -1.881307 |
| H  | -1.863525 | -0.108315 | -3.166630 |
| H  | -1.212660 | 2.505260  | -2.838484 |
| H  | -1.377809 | 2.033747  | -0.187879 |
| H  | -0.451040 | -2.023627 | -3.477284 |
| H  | 0.122770  | 2.938143  | -1.782586 |
| H  | -2.721947 | -1.324440 | -2.252976 |
| H  | -2.385434 | -0.130224 | -0.248838 |
| C  | 1.178009  | 0.141657  | -2.059283 |
| H  | 2.241321  | 0.283160  | -1.871004 |
| C  | 0.520736  | 1.174767  | -2.964726 |
| H  | 1.298197  | 1.784392  | -3.436785 |
| H  | -0.003517 | 0.670731  | -3.783821 |

**TS1** E=-686.007212333 H=-685.693341 G=-685.781599

|    |           |           |           |
|----|-----------|-----------|-----------|
| Rh | 0.295691  | -0.231895 | 0.053471  |
| Cl | 2.522132  | -0.555421 | -0.667178 |
| N  | -0.313234 | 0.847772  | -2.132446 |
| O  | -0.265664 | -0.989818 | -1.838017 |
| C  | 0.881543  | 1.279804  | -2.818044 |
| H  | 1.485292  | 0.450309  | -3.202950 |
| H  | 0.524020  | 1.877316  | -3.674938 |
| H  | 1.497925  | 1.893885  | -2.163155 |
| C  | -0.959506 | -0.248380 | -2.792066 |
| H  | -0.573379 | -0.456091 | -3.801737 |

|   |           |           |           |
|---|-----------|-----------|-----------|
| C | -2.467076 | -0.290322 | -2.759575 |
| H | -2.853780 | -0.057491 | -1.766284 |
| H | -2.879472 | 0.426952  | -3.477292 |
| H | -2.807102 | -1.290570 | -3.045991 |
| C | 1.044542  | 0.961698  | 1.629288  |
| C | 0.090117  | 2.084121  | 1.966336  |
| C | -1.358604 | -1.464059 | 2.209722  |
| C | -1.380207 | 1.656383  | 1.838013  |
| C | -1.587708 | -0.744976 | 0.896867  |
| C | -1.565621 | 0.645479  | 0.718722  |
| H | 2.038672  | 1.278937  | 1.317988  |
| H | 0.286982  | 2.906296  | 1.269312  |
| H | -1.749745 | 1.240715  | 2.780493  |
| H | -2.272944 | -1.446166 | 2.822228  |
| H | -2.093327 | -1.340525 | 0.136786  |
| H | 0.300882  | 2.479022  | 2.971825  |
| H | -1.168424 | -2.517682 | 1.977482  |
| H | -2.002123 | 2.534287  | 1.632828  |
| H | -2.014990 | 1.044825  | -0.186745 |
| C | 0.925707  | -0.378222 | 2.060378  |
| H | 1.838598  | -0.970965 | 2.014959  |
| C | -0.158385 | -0.900236 | 2.993523  |
| H | 0.265277  | -1.690112 | 3.622241  |
| H | -0.475562 | -0.109116 | 3.681057  |

**I3** E=-686.039670368 H=-685.723855 G=-685.811809

|    |           |           |           |
|----|-----------|-----------|-----------|
| Rh | 0.299059  | -0.315395 | -0.041847 |
| Cl | 2.424899  | -0.155819 | -0.985135 |
| N  | -0.603965 | 0.789068  | -1.541481 |
| O  | -0.392588 | -1.439074 | -1.511255 |
| C  | 0.127234  | 1.924381  | -2.072542 |
| H  | 1.104645  | 1.688833  | -2.507231 |
| H  | -0.513317 | 2.344483  | -2.865468 |
| H  | 0.246051  | 2.703573  | -1.315188 |
| C  | -0.554439 | -0.389718 | -2.429143 |
| H  | 0.317768  | -0.334399 | -3.107356 |
| C  | -1.830259 | -0.534507 | -3.242791 |
| H  | -2.702597 | -0.545821 | -2.583734 |
| H  | -1.936766 | 0.280860  | -3.966697 |
| H  | -1.789650 | -1.480994 | -3.792215 |
| C  | 0.620753  | 1.468299  | 1.277569  |
| C  | -0.720639 | 2.111571  | 1.531482  |
| C  | -0.401890 | -1.609643 | 2.503704  |
| C  | -1.862530 | 1.106688  | 1.763149  |
| C  | -1.164831 | -1.321113 | 1.228087  |
| C  | -1.756997 | -0.119173 | 0.879631  |
| H  | 1.330265  | 2.070554  | 0.712096  |
| H  | -0.966688 | 2.725025  | 0.659488  |
| H  | -1.906545 | 0.804298  | 2.813369  |
| H  | -1.105397 | -1.934421 | 3.284866  |
| H  | -1.418679 | -2.187690 | 0.619007  |

|   |           |           |           |
|---|-----------|-----------|-----------|
| H | -0.643162 | 2.805283  | 2.381818  |
| H | 0.247901  | -2.472478 | 2.316346  |
| H | -2.815390 | 1.603296  | 1.553455  |
| H | -2.385669 | -0.126505 | -0.004636 |
| C | 1.139871  | 0.351843  | 1.911567  |
| H | 2.202722  | 0.164933  | 1.766368  |
| C | 0.458623  | -0.434806 | 3.020474  |
| H | 1.233296  | -0.839189 | 3.679680  |
| H | -0.140634 | 0.238227  | 3.639714  |

**TS2** E=-686.014326758 H=-685.701543 G=-685.786469

|    |           |           |           |
|----|-----------|-----------|-----------|
| Rh | -0.281147 | -0.072629 | -0.163199 |
| Cl | -2.539604 | -0.664261 | 0.351802  |
| N  | 1.113145  | 0.200777  | -1.763516 |
| O  | -0.919318 | 1.112108  | -1.661465 |
| C  | 1.902425  | -0.947226 | -2.167670 |
| H  | 1.356473  | -1.908583 | -2.167555 |
| H  | 2.255952  | -0.773141 | -3.194410 |
| H  | 2.793763  | -1.047906 | -1.545422 |
| C  | -0.196499 | 0.198832  | -2.370965 |
| H  | -0.652051 | -0.867760 | -2.107552 |
| C  | -0.305405 | 0.307897  | -3.890613 |
| H  | 0.156596  | 1.249746  | -4.199388 |
| H  | 0.186016  | -0.526557 | -4.395674 |
| H  | -1.362322 | 0.320010  | -4.163095 |
| C  | 1.221973  | -1.318113 | 0.932881  |
| C  | 2.444712  | -0.472313 | 1.219500  |
| C  | -0.757348 | 0.920153  | 2.639759  |
| C  | 2.125409  | 1.010564  | 1.479475  |
| C  | -0.399010 | 1.479562  | 1.283936  |
| C  | 0.896430  | 1.492136  | 0.730801  |
| H  | 1.384702  | -2.175846 | 0.280350  |
| H  | 3.119472  | -0.540937 | 0.363470  |
| H  | 1.987996  | 1.194287  | 2.550463  |
| H  | -0.459634 | 1.641192  | 3.416022  |
| H  | -1.132979 | 2.154170  | 0.845651  |
| H  | 2.991742  | -0.903574 | 2.070586  |
| H  | -1.844843 | 0.836875  | 2.680016  |
| H  | 2.981759  | 1.619306  | 1.174180  |
| H  | 1.066053  | 2.144465  | -0.120410 |
| C  | 0.065578  | -1.317728 | 1.693266  |
| H  | -0.629220 | -2.140856 | 1.558187  |
| C  | -0.137698 | -0.463437 | 2.931051  |
| H  | -0.797167 | -1.002301 | 3.617187  |
| H  | 0.821705  | -0.356088 | 3.448520  |

**I4** E=-686.085010525 H=-685.770357 G=-685.861502

|    |           |           |           |
|----|-----------|-----------|-----------|
| Rh | -0.410115 | -0.312401 | -0.098526 |
| Cl | -2.453321 | -0.421626 | 1.109204  |
| N  | 0.595843  | -0.222094 | -1.928859 |
| O  | -1.366401 | 0.673716  | -1.683191 |

|   |           |           |           |
|---|-----------|-----------|-----------|
| C | 1.700027  | -0.831181 | -2.622258 |
| H | 1.824299  | -1.871038 | -2.301030 |
| H | 1.536017  | -0.839802 | -3.705613 |
| H | 2.643534  | -0.304523 | -2.430785 |
| C | -0.413994 | 0.387913  | -2.502274 |
| H | -0.922320 | -1.648866 | -0.616948 |
| C | -0.549541 | 0.737518  | -3.954870 |
| H | 0.379330  | 1.136303  | -4.371046 |
| H | -0.833071 | -0.147811 | -4.534606 |
| H | -1.342234 | 1.480174  | -4.057669 |
| C | 1.288130  | -1.318131 | 0.797814  |
| C | 2.546419  | -0.483039 | 0.705574  |
| C | -0.199311 | 1.213282  | 2.669577  |
| C | 2.361461  | 1.026036  | 0.972190  |
| C | -0.067057 | 1.702564  | 1.247725  |
| C | 1.049709  | 1.594013  | 0.478107  |
| H | 1.343139  | -2.277740 | 0.284301  |
| H | 2.975481  | -0.622599 | -0.289751 |
| H | 2.456311  | 1.231464  | 2.042458  |
| H | 0.275763  | 1.934592  | 3.350879  |
| H | -0.904451 | 2.279768  | 0.860825  |
| H | 3.289286  | -0.893515 | 1.406842  |
| H | -1.263539 | 1.203511  | 2.909824  |
| H | 3.184774  | 1.565658  | 0.491334  |
| H | 1.053950  | 2.080579  | -0.494360 |
| C | 0.303818  | -1.184223 | 1.777410  |
| H | -0.360730 | -2.030389 | 1.925084  |
| C | 0.372334  | -0.198293 | 2.936574  |
| H | -0.181267 | -0.631093 | 3.774889  |
| H | 1.415686  | -0.132831 | 3.266701  |

**TS3** E=-686.051105867 H=-685.739899 G=-685.832406

|    |           |           |           |
|----|-----------|-----------|-----------|
| Rh | -0.256097 | -0.080920 | -0.037498 |
| Cl | -2.568070 | -0.717826 | 0.313863  |
| N  | 0.534697  | -0.521460 | -2.080319 |
| O  | -0.817914 | 1.144169  | -1.668633 |
| C  | 1.412720  | -1.388753 | -2.827022 |
| H  | 1.327757  | -2.410521 | -2.446588 |
| H  | 1.154893  | -1.409096 | -3.892520 |
| H  | 2.460577  | -1.079054 | -2.727154 |
| C  | -0.110041 | 0.537627  | -2.542837 |
| H  | -0.459692 | -1.214440 | -1.149039 |
| C  | -0.059655 | 1.025885  | -3.959113 |
| H  | 0.967482  | 1.237523  | -4.272336 |
| H  | -0.472687 | 0.276149  | -4.642234 |
| H  | -0.654028 | 1.936921  | -4.035091 |
| C  | 1.163587  | -1.323735 | 0.984648  |
| C  | 2.458791  | -0.554728 | 1.148244  |
| C  | -0.635237 | 1.028867  | 2.771074  |
| C  | 2.248199  | 0.930653  | 1.488414  |
| C  | -0.261132 | 1.555223  | 1.405420  |

|   |           |           |           |
|---|-----------|-----------|-----------|
| C | 1.011713  | 1.504435  | 0.811399  |
| H | 1.247171  | -2.230177 | 0.383899  |
| H | 3.002341  | -0.623015 | 0.199096  |
| H | 2.181723  | 1.074904  | 2.571574  |
| H | -0.340725 | 1.740797  | 3.557091  |
| H | -0.969033 | 2.267489  | 0.982364  |
| H | 3.092890  | -1.052038 | 1.898916  |
| H | -1.726713 | 0.961212  | 2.798365  |
| H | 3.129269  | 1.496777  | 1.168019  |
| H | 1.194922  | 2.203531  | -0.003244 |
| C | 0.036875  | -1.224781 | 1.805110  |
| H | -0.694728 | -2.024122 | 1.732820  |
| C | -0.051317 | -0.364431 | 3.054801  |
| H | -0.686087 | -0.878743 | 3.783104  |
| H | 0.939624  | -0.290379 | 3.515187  |

**I5** E=-686.156066230 H=-685.838468 G=-685.933205

|    |           |           |           |
|----|-----------|-----------|-----------|
| Rh | 0.167128  | -0.046394 | 0.286313  |
| Cl | 2.254935  | -0.200098 | -0.898511 |
| N  | 0.303402  | 0.043986  | -3.259139 |
| O  | -1.092379 | -0.038170 | -1.469816 |
| C  | 0.595234  | 0.105374  | -4.675530 |
| H  | 0.244321  | -0.785594 | -5.209279 |
| H  | 0.154484  | 0.990672  | -5.146875 |
| H  | 1.678219  | 0.164784  | -4.793012 |
| C  | -0.907854 | 0.022057  | -2.711758 |
| H  | 1.087338  | -0.017820 | -2.590529 |
| C  | -2.111051 | 0.080260  | -3.617945 |
| H  | -2.134054 | 1.027103  | -4.167942 |
| H  | -2.088583 | -0.727983 | -4.355789 |
| H  | -3.013281 | -0.004154 | -3.013861 |
| C  | 1.191948  | 0.781213  | 1.913192  |
| C  | 0.337573  | 1.824905  | 2.600593  |
| C  | -1.185121 | -1.671390 | 2.397804  |
| C  | -1.159417 | 1.469059  | 2.580217  |
| C  | -1.549491 | -0.730265 | 1.269135  |
| C  | -1.520799 | 0.680146  | 1.330392  |
| H  | 2.136640  | 1.155407  | 1.519614  |
| H  | 0.486903  | 2.769535  | 2.065585  |
| H  | -1.436991 | 0.899003  | 3.473274  |
| H  | -2.001082 | -1.734682 | 3.134137  |
| H  | -2.177747 | -1.170059 | 0.493501  |
| H  | 0.689663  | 1.996882  | 3.629530  |
| H  | -1.083845 | -2.673987 | 1.967276  |
| H  | -1.754726 | 2.387840  | 2.615286  |
| H  | -2.120455 | 1.211790  | 0.591748  |
| C  | 1.094342  | -0.615865 | 2.092531  |
| H  | 1.966701  | -1.202571 | 1.807626  |
| C  | 0.139834  | -1.280739 | 3.075606  |
| H  | 0.616005  | -2.174743 | 3.491962  |
| H  | -0.040118 | -0.613107 | 3.925439  |



**P** E=-248.434069086 **H**=-248.320779 **G**=-248.372866

|   |           |           |           |
|---|-----------|-----------|-----------|
| N | -0.663982 | -0.067659 | -0.652655 |
| O | -0.904854 | 0.031503  | 1.590340  |
| C | 0.076125  | 0.032743  | -1.890026 |
| H | 0.395970  | 1.058694  | -2.121679 |
| H | 0.964548  | -0.604911 | -1.868985 |
| H | -0.554572 | -0.316425 | -2.711139 |
| C | -0.162249 | -0.004994 | 0.619650  |
| H | -1.671014 | -0.000302 | -0.686905 |
| C | 1.348542  | -0.008030 | 0.748749  |
| H | 1.779106  | -0.932762 | 0.349243  |
| H | 1.803315  | 0.828672  | 0.207948  |
| H | 1.594834  | 0.070306  | 1.807138  |
